# Supplementary material for: Genome-wide identification and expression profiling of the carotenoid cleavage dioxygenase (CCD) gene family in Brassica napus L
Source: PLoS One. 2020 Sep 3;15(9):e0238179. doi: 10.1371/journal.pone.0238179 (PMC7470270; doi:10.1371/journal.pone.0238179)
Supplement: S3 Table — (XLSX) [file pone.0238179.s003.xlsx]

## Sheet: promoter
BnCCD1a	AAGAA-motif	A-box	ABRE	ACE	AC-I	AE-box	ARE	as-1	AT~TATA-box	AT-rich element	AT-rich sequence	Box 4	CAAT-box	CAT-box	CCAAT-box	chs-CMA1a	circadian	CTAG-motif	DRE1	ERE	Gap-box	GARE-motif	GATA-motif	G-Box	GT1-motif	H-box	I-box	LTR	MBS	MBSI	Myb	MYB-like sequence	MYC	P-box	RY-element	STRE	TATA	TATA-box	TCA	TCA-element	TCCC-motif	TCT-motif	Unnamed__1	Unnamed__2	Unnamed__4	Unnamed__6	W box	WRE3	WUN-motif
BnCCD1b	AAGAA-motif	ABRE	AE-box	ARE	as-1	AT~TATA-box	Box 4	Box II -like sequence	box S	CAAT-box	CAT-box	DRE core	DRE1	ERE	Gap-box	GARE-motif	GATA-motif	GCN4_motif	I-box	L-box	LTR	MBS	MYB-like sequence	P-box	STRE	TATA-box	TCA	TCCC-motif	TCT-motif	Unnamed__1	Unnamed__4	Unnamed__6	W box	WRE3
BnCCD1c	AAGAA-motif	A-box	ABRE	AE-box	ARE	as-1	AT~TATA-box	AuxRR-core	Box 4	box S	CAAT-box	CAT-box	DRE core	ERE	GARE-motif	GATA-motif	G-Box	GCN4_motif	I-box	LAMP-element	LTR	MBS	MRE	MYB-like sequence	MYC	P-box	STRE	TATA-box	TCA	TCCC-motif	TC-rich repeats	TCT-motif	TGA-element	Unnamed__1	Unnamed__4	Unnamed__6	W box	WUN-motif
BnCCD1d	4cl-CMA1b	AAGAA-motif	A-box	ABRE	AE-box	ARE	as-1	AT~TATA-box	Box 4	Box II -like sequence	CAAT-box	CAT-box	CCAAT-box	chs-CMA1a	chs-CMA2a	circadian	DRE core	DRE1	ERE	F-box	GA-motif	GARE-motif	GATA-motif	GC-motif	GT1-motif		I-box	LAMP-element	LTR	MBS	MBSI	MRE	MSA-like	MYB-like sequence	MYC	O2-site	RY-element	Sp1	STRE	TATA	TATA-box	TCA	TCA-element	TCCC-motif	TC-rich repeats	TCT-motif	TGA-element	Unnamed__1	Unnamed__2
BnCCD1e	3-AF1 binding site	AAGAA-motif	A-box	ABRE	ABRE3a	AE-box	ARE	as-1	AT~TATA-box	AT1-motif	AT-rich sequence	Box 4	CAAT-box	CAT-box	CCAAT-box	circadian	DRE core	DRE1	ERE	GARE-motif	GATA-motif	GC-motif	GT1-motif	I-box	LS7	LTR	MBS	MBSI	MRE	Myb	MYB-like sequence	MYC	O2-site	RY-element	STRE	TATA	TATA-box	TCA	TCA-element	TCCC-motif	TCT-motif	TGA-element	Unnamed__1	Unnamed__2	Unnamed__4	Unnamed__6	W box	WRE3	WUN-motif
BnNCED2a	A-box	ABRE	ARE	as-1	AT~TATA-box	CAAT-box	CAT-box	CCAAT-box	DRE1	G-Box	GT1-motif	LTR	Myb	MYB-like sequence	O2-site	STRE	TATA-box	TCA	TCA-element	Unnamed__1	Unnamed__2	Unnamed__4
BnNCED2b	A-box	ABRE	ABRE3a	ARE	as-1	AT~TATA-box	CAAT-box	CAT-box	CCAAT-box	chs-CMA2a	DRE1	GT1-motif	LTR	MYB	MYC	O2-site	STRE	TATA-box	TCA	TCA-element	TC-rich repeats	TGA-element	Unnamed__1	Unnamed__16	Unnamed__4
BnNCED2c	A-box	ABRE	ARE	as-1	AT~TATA-box	CAAT-box	CAT-box	CCAAT-box	DRE1	G-Box	GT1-motif	LTR	Myb	MYB-like sequence	O2-site	STRE	TATA-box	TCA	TCA-element	TC-rich repeats	TCT-motif	Unnamed__1	Unnamed__2	Unnamed__4
BnNCED2d	A-box	ABRE	ABRE3a	ARE	as-1	CAAT-box	CAT-box	CCAAT-box	chs-CMA2a	DRE1	GT1-motif	LTR	Myb	MYB-like sequence	MYC	STRE	TATA-box	TCA	TCA-element	TC-rich repeats	TGA-element	Unnamed__1	Unnamed__4
BnNCED3a	AAGAA-motif	A-box	ABRE	ABRE3a	ARE	as-1	CAAT-box	CCAAT-box	chs-CMA1a	chs-Unit 1 m1	DRE core	G-box	GT1-motif	LTR	MBS	O2-site	OCT	STRE	TATA-box	TGA-element	Unnamed__1	Unnamed__16	WRE3
BnNCED3b	AAGAA-motif	A-box	ABRE	as-1	CAAT-box	CCAAT-box	chs-CMA1a	DRE core	GT1-motif	LTR	Myb	MYB-like sequence	MYC	OCT	TATA-box	TCT-motif	TGA-element	Unnamed__1	Unnamed__2	Unnamed__4	W box
BnNCED3c	AAGAA-motif	A-box	ABRE	ABRE3a	ACTCATCCT sequence	ARE	as-1	AT-rich sequence	CAAT-box	CCAAT-box	chs-CMA1a	DRE core	ERE	GATA-motif	GT1-motif	LTR	MSA-like	Myb	O2-site	OCT	STRE	TATA-box	TCT-motif	TGA-element	Unnamed__1	Unnamed__16	Unnamed__2	W box	WRE3
BnNCED3d	AAGAA-motif	A-box	ABRE	ABRE3a	ARE	as-1	AT~TATA-box	CAAT-box	CCAAT-box	chs-CMA1a	DRE core	G-box	GT1-motif	LTR	MBS	O2-site	OCT	STRE	TATA-box	TGA-element	Unnamed__1	Unnamed__16	Unnamed__2	W box	WRE3
BnNCED3e	AAGAA-motif	A-box	ABRE	ABRE3a	ACTCATCCT sequence	ARE	as-1	CAAT-box	CCAAT-box	LTR	Myb	STRE	TGA-element	Unnamed__1	Unnamed__16	WRE3
BnNCED3f	AAGAA-motif	A-box	ABRE	as-1	CAAT-box	GATA-motif	G-box	GT1-motif	O2-site	OCT	STRE	TATA-box	TCT-motif	TGA-element	Unnamed__1	Unnamed__4	WRE3
BnNCED3g	AAGAA-motif	A-box	ABRE	ABRE3a	ACTCATCCT sequence	ARE	as-1	CAAT-box	CCAAT-box	DRE core	GATA-motif	GT1-motif	I-box	LTR	Myb	O2-site	OCT	STRE	TATA-box	TCT-motif	TGA-element	Unnamed__1	Unnamed__16	Unnamed__2	WRE3
BnNCED3h	AAGAA-motif	ABRE	ARE	as-1	AT~TATA-box	box S	CAAT-box	CCAAT-box	CTAG-motif	DRE core	GT1-motif	LTR	Myb	MYB-like sequence	OCT	TATA-box	TCA-element	TCT-motif	TGA-element	Unnamed__1	Unnamed__2	Unnamed__4	W box	WRE3
BnCCD4a	A-box	ABRE	ABRE2	ABRE3a	ACE	AE-box	ARE	as-1	AT~TATA-box	AT-rich sequence	CAAT-box	CCAAT-box	DRE core	ERE	GATA-motif	I-box	LTR	MRE	MYB	Myb-binding site	O2-site	Sp1	TATA-box	TCCC-motif	Unnamed__1	Unnamed__2	Unnamed__4	WRE3
BnCCD4b	A-box	ABRE	ABRE3a	ACE	AE-box	ARE	as-1	box S	CAAT-box	CAT-box	CCAAT-box	GT1-motif	I-box	LTR	MBS	O2-site	STRE	TATA-box	TCA	TCA-element	TCCC-motif	TGA-element	Unnamed__1	Unnamed__4	WRE3
BnCCD4c	AAGAA-motif	A-box	ABRE	ABRE2	ABRE3a	ACE	AE-box	ARE	as-1	AT~TATA-box	CAAT-box	CCAAT-box	DRE core	ERE	GATA-motif	G-Box	I-box	LTR	MRE	MYB	Myb-binding site	O2-site	Sp1	TATA-box	TCA	TCCC-motif	TCT-motif	Unnamed__1	Unnamed__2	Unnamed__4	WRE3
BnNCED5a	ABRE	ARE	as-1	CAAT-box	CCAAT-box	DRE1	G-Box	GT1-motif	LTR	MBSI	Myb	Myb-binding site	MYB-like sequence	O2-site	STRE	TATA-box	TCCC-motif	TC-rich repeats	TGA-element	Unnamed__1	Unnamed__4	W box
BnNCED5b	ABRE	ARE	as-1	CAAT-box	CCAAT-box	DRE1	G-Box	GT1-motif	LTR	MBSI	MYB	O2-site	STRE	TATA-box	TCCC-motif	TC-rich repeats	TGA-element	Unnamed__1	Unnamed__4	W box	WUN-motif
BnNCED6a	A-box	ABRE	ABRE3a	ARE	as-1	Box 4	CAAT-box	CAT-box	CCAAT-box	chs-Unit 1 m1	DRE core	GT1-motif	I-box	LTR	MBS	Myb	MYC	re2f-1	Sp1	TCCC-motif	TGA-element	Unnamed__1	Unnamed__10	Unnamed__4	W box	WRE3
BnNCED6b	A-box	ABRE	ARE	as-1	Box 4	CAAT-box	CAT-box	CCAAT-box	chs-Unit 1 m1	GT1-motif	I-box	LTR	MBS	Myb	MYC	NON	O2-site	re2f-1	Sp1	TCA-element	TCCC-motif	TGA-element	Unnamed__1	Unnamed__10	Unnamed__4	W box	WRE3
BnCCD7a	3-AF1 binding site	AAGAA-motif	ABRE	ABRE3a	AE-box	ARE	as-1	AT~TATA-box	ATC-motif	ATCT-motif	Box 4	Box II	CAAT-box	CCAAT-box	DRE core	DRE1	ERE	GA-motif	GARE-motif	GATA-motif	GT1-motif	I-box	LAMP-element	LTR	MBS	Myb	MYB-like sequence	MYC	Sp1	STRE	TATA-box	TCA	TCA-element	TCCC-motif	TC-rich repeats	TCT-motif	Unnamed__1	Unnamed__10	Unnamed__2	Unnamed__4	Unnamed__6	W box	WRE3	WUN-motif
BnCCD7b	3-AF3 binding site	A-box	ABRE	ABRE3a	ARE	as-1	AT~TATA-box	ATCT-motif	Box 4	Box II	CAAT-box	CCAAT-box	circadian	DRE1	ERE	F-box	GA-motif	GARE-motif	GATA-motif	GT1-motif	I-box	LAMP-element	LTR	MBS	MYB-like sequence	MYC	Sp1	STRE	TATA-box	TCA	TCCC-motif	TCT-motif	Unnamed__1	Unnamed__10	Unnamed__2	Unnamed__4	W box	WRE3	WUN-motif
BnCCD8a	3-AF1 binding site	ABRE	ACE	ARE	as-1	AT~TATA-box	ATCT-motif	AuxRR-core	Box 4	CAAT-box	CAT-box	CCAAT-box	chs-Unit 1 m1	CTAG-motif	DRE core	DRE1	ERE	GATA-motif	G-box	GCN4_motif	GT1-motif	I-box	motif I	MRE	MSA-like	Myb	MYB-like sequence	MYC	O2-site	P-box	STRE	TATA-box	TCA	TC-rich repeats	TCT-motif	TGA-element	Unnamed__1	Unnamed__2	Unnamed__4	Unnamed__6	WRE3
BnCCD8b	3-AF1 binding site	AAGAA-motif	ABRE	ABRE3a	ACE	AE-box	AP-1	ARE	as-1	AT~TATA-box	AT-rich element	AuxRR-core	Box 4	CAAT-box	CAT-box	CCAAT-box	chs-CMA1a	CTAG-motif	DRE core	DRE1	ERE	GA-motif	GATA-motif	G-box	GCN4_motif	GT1-motif	I-box	LAMP-element	LTR	MBS	motif I	MRE	MSA-like	Myb	MYB-like sequence	MYC	O2-site	P-box	re2f-1	RY-element	Sp1	STRE	TATA	TATA-box	TCA	TCA-element	TCCC-motif	TC-rich repeats	TCT-motif
BnNCED9a	A-box	ABRE	ABRE3a	ARE	as-1	AT~TATA-box	AT-rich sequence	CAAT-box	C-box	CCAAT-box	chs-CMA1a	DRE core	DRE1	GATA-motif	GC-motif	GT1-motif	LTR	Myb	MYB-like sequence	Myc	O2-site	OCT	RY-element	Sp1	STRE	TATA-box	TC-rich repeats	TGA-element	Unnamed__1	Unnamed__16	Unnamed__2	Unnamed__4	W box
BnNCED9b	ABRE	ABRE3a	ARE	as-1	AT~TATA-box	AT-rich sequence	CAAT-box	C-box	CCAAT-box	chs-CMA1a	chs-Unit 1 m1	CTAG-motif	DRE core	GATA-motif	G-Box	GC-motif	GT1-motif	LTR	Myb	MYB-like sequence	Myc	OCT	RY-element	Sp1	STRE	TCA	TGA-element	Unnamed__1	Unnamed__16	Unnamed__4	W box	WRE3
[truncated: 7 more columns]

## Sheet: annotation
Type	Number	Annotation
3-AF1 binding site	4	light responsive element
3-AF3 binding site	1	part of a conserved DNA module array (CMA3)
4cl-CMA1b	1	light responsive element
AAGAA-motif	16	Avena sativa
A-box	22	cis-acting regulatory element
ABRE	30	cis-acting element involved in the abscisic acid responsiveness
ABRE2	2	Zea mays
ABRE3a	17	Zea mays
ACE	6	cis-acting element involved in light responsiveness
AC-I	1	Arabidopsis thaliana
ACTCATCCT sequence	3	Arabidopsis thaliana
AE-box	10	part of a module for light response
AP-1	1	Arabidopsis thaliana
ARE	28	cis-acting regulatory element essential for the anaerobic induction
as-1	30	Arabidopsis thaliana
AT~TATA-box	18	Arabidopsis thaliana
AT1-motif	1	part of a light responsive module
ATC-motif	1	part of a conserved DNA module involved in light responsiveness
ATCT-motif	3	part of a conserved DNA module involved in light responsiveness
AT-rich element	2	binding site of AT-rich DNA binding protein (ATBP-1)
AT-rich sequence	6	element for maximal elicitor-mediated activation (2copies)
AuxRR-core	3	cis-acting regulatory element involved in auxin responsiveness
Box 4	11	part of a conserved DNA module involved in light responsiveness
Box II	2	part of a light responsive element
Box II -like sequence	2	cis-acting regulatory element
box S	4	Arabidopsis thaliana
CAAT-box	30	common cis-acting element in promoter and enhancer regions
CAT-box	14	cis-acting regulatory element related to meristem expression
C-box	2	cis-acting regulatory element involved in light responsiveness
CCAAT-box	27	MYBHv1 binding site
chs-CMA1a	9	part of a light responsive element
chs-CMA2a	3	part of a light responsive element
chs-Unit 1 m1	5	part of a light responsive element
circadian	4	cis-acting regulatory element involved in circadian control
CTAG-motif	5	Avena sativa
DRE core	18	Arabidopsis thaliana
DRE1	15	Zea mays
GARE-motif	7	gibberellin-responsive element
F-box	2	Lycopersicon esculentum
GA-motif	4	part of a light responsive element
Gap-box	2	part of a light responsive element
ERE	12	ethylene-responsive element
GATA-motif	16	part of a light responsive element
G-Box	13	cis-acting regulatory element involved in light responsiveness
GC-motif	4	enhancer-like element involved in anoxic specific inducibility
GCN4_motif	4	cis-regulatory element involved in endosperm expression
GT1-motif	25	light responsive element
H-box	1	Phaseolus vulgaris
HD-Zip 1	1	element involved in differentiation of the palisade mesophyll cells
I-box	15	part of a light responsive element
LAMP-element	5	part of a light responsive element
L-box	1	part of a light responsive element
LS7	1	part of a light responsive element
LTR	28	cis-acting element involved in low-temperature responsiveness
MBS	13	MYB binding site involved in drought-inducibility
MBSI	5	MYB binding site involved in flavonoid biosynthetic genes regulation
motif I	2	cis-acting regulatory element root specific
MRE	7	MYB binding site involved in light responsiveness
MSA-like	4	cis-acting element involved in cell cycle regulation
Myb	22	Arabidopsis thaliana
Myb-binding site	3	Nicotiana tabacum
MYB-like sequence	17	Arabidopsis thaliana
MYC	15	Arabidopsis thaliana
NON	1	Nicotiana tabacum
O2-site	19	cis-acting regulatory element involved in zein metabolism regulation
OCT	9	Zea mays
P-box	5	gibberellin-responsive element
re2f-1	3	Oryza sativa
RY-element	6	cis-acting regulatory element involved in seed-specific regulation
Sp1	10	light responsive element
STRE	24	Arabidopsis thaliana
TATA-box	30	core promoter element around -30 of transcription start
TCA	16	Pisum sativum
TCA-element	12	cis-acting element involved in salicylic acid responsiveness
TCCC-motif	15	part of a light responsive element
TC-rich repeats	11	cis-acting element involved in defense and stress responsiveness
TCT-motif	16	part of a light responsive element
TGA-element	22	auxin-responsive element
W box	18	Arabidopsis thaliana
WRE3	21	Pisum sativum
WUN-motif	7	wound-responsive element
Unnamed__1	30	Zea mays
Unnamed__10	4	Zea mays
Unnamed__16	8	Zea mays
Unnamed__2	17	Petroselinum hortense
Unnamed__4	25	Petroselinum hortense
Unnamed__6	8	Zea mays
